# Supplementary material
Source: PubMed Central journal article supplement (PMC1326038)
Supplement: plntphys_pp.105.072967_1.pdf [file plntphys_pp.105.072967_1.pdf]

**Supplemental Table I:** Phenotypic study of individuals from wild type, *atem6-1* mutant and *atem6-1* complement plants. Percentages indicate the percent of siliques that were scored as wild type.

| Plant Number | Percent Wild Type Phenotype<br>Plant Type |                       |                           |
|--------------|-------------------------------------------|-----------------------|---------------------------|
|              | Wild Type                                 | <i>atem6-1</i> Mutant | <i>atem6-1</i> Complement |
| 1            | 100%                                      | 33%                   | 100%                      |
| 2            | 100%                                      | 20%                   | 100%                      |
| 3            | 100%                                      | 25%                   | 100%                      |
| 4            | 89%                                       | 0%                    | 100%                      |
| 5            | 88%                                       | 11%                   | 95%                       |
| Ave % WT     | 95%                                       | 18%                   | 99%                       |

**Supplemental Table II:** Least significant differences ANOVA for the phenotypic study of individuals from wild type, *atem6-1* mutant and *atem6-1* complement plants. The ANOVA was done as a comparison of *atem6-1* mutant and *atem6-1* complement populations compared to the wild type population. P-values are given for the arcsine squared converted data of the percent of siliques scored as wild type.

| Plant Type                | P-Value |
|---------------------------|---------|
| Wild Type                 | 1.0000  |
| <i>atem6-1</i> Mutant     | 0.0001  |
| <i>atem6-1</i> Complement | 0.5240  |

**Supplemental Table III:** Three way contingency table to determine if the phenotypes of the three plant populations could be the result of chance. Chi square value is greater than alpha, indicating that the phenotypic differences in the three populations could not be the product of chance and are therefore directly related to plant type.

|                                          |            |       |        |        |
|------------------------------------------|------------|-------|--------|--------|
|                                          | Plant Type | WT    | MT     | Total  |
| Contingency<br>Table                     | Wild Type  | 50    | 5      | 55     |
|                                          | Mutant     | 6     | 15     | 21     |
|                                          | Complement | 63    | 2      | 65     |
|                                          | Total      | 119   | 22     | 282    |
|                                          | Plant Type | WT    | MT     | Total  |
| Estimated<br>Expected<br>Values<br>(EEV) | Wild Type  | 23.21 | 4.29   | 27.50  |
|                                          | Mutant     | 8.86  | 1.64   | 10.50  |
|                                          | Complement | 27.43 | 5.07   | 32.50  |
|                                          | Total      | 59.50 | 11.00  | 141.00 |
|                                          | Plant Type | WT    | MT     |        |
| Sum of<br>EEV                            | Wild Type  | 30.93 | 0.12   |        |
|                                          | Mutant     | 0.92  | 108.98 |        |
|                                          | Complement | 46.13 | 1.86   |        |
| Chi Square Value = 188.93                |            |       |        |        |
| Degrees Of Freedom = 2                   |            |       |        |        |
| Alpha 0.001 = 13.82                      |            |       |        |        |
